# Supplementary material
Source: MDPI journal article supplement (https://www.mdpi.com/2073-4395/13/2/470)
Supplement: s1 [file s1]

## Supplementary Materials

**Table S1.** Carbon and nitrogen inputs expressed as the volume of Raw (RDE) or Lagoon Dairy effluent (LDE) applied to fescue pots (mean  $n = 3 \pm \text{S.E.}$ ). Different letters beside the numbers indicate they are significantly different at  $p < 0.05$ .

| Parameter                          | Application dates |        |          |        |         |           |         |         |
|------------------------------------|-------------------|--------|----------|--------|---------|-----------|---------|---------|
| L pot <sup>-1</sup><br>applied     | September         |        | November |        | January |           | March   |         |
|                                    | RDE               | LDE    | RDE      | LDE    | RDE     | LDE       | RDE     | LDE     |
| Organic C                          | 339.3±            | 126.8± | 365.1±   | 118.2± | 222.5±  | 410.0±    | 262.1±  | 139.6±  |
| mg                                 | 38.9 de           | 6.4 ab | 31.4 d   | 41.9 a | 10.5 bc | 44.6 d    | 30.6 cd | 33.1 ab |
| Organic N                          | 56.9±             | 36.6±  | 57.3±    | 53.4±  | 61.3±   | 61.9±     | 58.9±   | 61.9±   |
| mg                                 | 0.7 a             | 5.4 a  | 1.0 a    | 8.6 a  | 1.4 a   | 7.5 a     | 1.6 a   | 5.1 a   |
| NH <sub>4</sub> <sup>+</sup> -N mg | 25.1±             | 44.3±  | 22.6±    | 26.8±  | 18.9±   | 17.6± 0.3 | 21.2±   | 18.2±   |
|                                    | 0.7 ab            | 6.7 c  | 2.6 ab   | 1.2 b  | 0.3 a   | a         | 1.7 ab  | 0.2 a   |

**Table S2.** Soil organic carbon (SOC), the sum N-mineralization and Yield-scaled N<sub>2</sub>O emission at the last application of Raw (RDE) or Lagoon Dairy effluent (LDE), urea, or non-amended control (mean  $n = 3 \pm \text{S.E.}$ ). Different letters beside the numbers indicate they are significantly different at  $p < 0.05$ . ns: no significantly different.

| Treatment | SOC (%)  | Sum N <sub>min</sub><br>(g pot <sup>-1</sup> ) | Yield-scaled N <sub>2</sub> O<br>emission for the last<br>application<br>(mg N-N <sub>2</sub> O g <sup>-1</sup> forage<br>DM) |
|-----------|----------|------------------------------------------------|-------------------------------------------------------------------------------------------------------------------------------|
| Control   | 3.0± 0.1 | 1.1 ± 0.1 b                                    | 1.1 ± 0.8                                                                                                                     |
| LDE       | 3.1± 0.1 | 1.2 ± 0.0 ab                                   | 2.8 ± 1.3                                                                                                                     |
| RDE       | 3.1± 0.1 | 1.4 ± 0.2 a                                    | 5.1 ± 1.0                                                                                                                     |
| Urea      | 3.0± 0.1 | 1.6 ± 0.4 ab                                   | 1.8 ± 1.5                                                                                                                     |
|           | ns       |                                                | ns                                                                                                                            |

**Table S3.** Cumulative nitrogen transformations in soil with fescue pasture with the application of Raw (RDE) or Lagoon Dairy effluent (LDE), urea, or non-amended control. Cumulative production after 45 days of each application date is presented (mean  $n = 3 \pm \text{S.E.}$ ); except for  $\text{N}_2\text{O}$  emissions after 20 days. Different letters beside the numbers indicate significant differences at  $p < 0.05$  for each application date.

| Cumulative production                                        |           |                      |                       |                     |                      |
|--------------------------------------------------------------|-----------|----------------------|-----------------------|---------------------|----------------------|
|                                                              | Treatment | Application date     |                       |                     |                      |
|                                                              |           | Sep.                 | Nov.                  | Jan.                | Mar.                 |
| $\text{N}_2\text{O}$ emissions<br>( $\text{kg N ha}^{-1}$ )  | Control   | $0.3 \pm 0.3$ a      | n.d                   | $2.7 \pm 2.1$ a     | $0.2 \pm 0.1$ a      |
|                                                              | LDE       | $7.9 \pm 7.6$ a      | n.d                   | $7.7 \pm 7.4$ a     | $0.4 \pm 0.1$ a      |
|                                                              | RDE       | $9.1 \pm 8.9$ a      | n.d                   | $6.6 \pm 3.5$ a     | $1.3 \pm 0.9$ b      |
|                                                              | Urea      | $0.4 \pm 0.4$ a      | n.d                   | $6.4 \pm 1.7$ a     | $0.4 \pm 0.3$ a      |
| Potential mineralizable N<br>( $\text{mg N g}^{-1}$ )        | Control   | $164.3 \pm 4.3$ a    | $153.6 \pm 4.5$ a     | $194.6 \pm 2.8$ a   | $94.0 \pm 2.1$ a     |
|                                                              | LDE       | $166.1 \pm 21.2$ a   | $165.8 \pm 2.2$ a     | $200.2 \pm 8.1$ a   | $128.4 \pm 0.6$ a    |
|                                                              | RDE       | $167.2 \pm 6.0$ a    | $179.3 \pm 3.7$ a     | $204.8 \pm 9.9$ a   | $198.7 \pm 21.3$ b   |
|                                                              | Urea      | $130.5 \pm 11.1$ a   | $166.6 \pm 6.4$ a     | $219.0 \pm 34.9$ a  | $104.3 \pm 10.4$ a   |
| Potential nitrification activity<br>( $\text{mg N g}^{-1}$ ) | Control   | $406.4 \pm 12.0$ a   | $547.5 \pm 42.4$ a    | $793.9 \pm 47.8$ ab | $763.6 \pm 101.1$ ab |
|                                                              | LDE       | $424.6 \pm 58.4$ a   | $591.1 \pm 59.7$ a    | $999.1 \pm 61.1$ b  | $970.1 \pm 67.0$ b   |
|                                                              | RDE       | $413.9 \pm 38.5$ a   | $613.8 \pm 82.1$ a    | $890.5 \pm 48.1$ ab | $963.1 \pm 34.4$ b   |
|                                                              | Urea      | $336.2 \pm 14.4$ a   | $419.1 \pm 49.5$ a    | $709.0 \pm 75.7$ a  | $664.6 \pm 55.1$ a   |
| Inorganic N<br>( $\text{mg N g}^{-1}$ )                      | Control   | $1954.9 \pm 108.8$ a | $2433.3 \pm 178.6$ a  | $728.5 \pm 47.7$ a  | $913.4 \pm 173.1$ a  |
|                                                              | LDE       | $3399.6 \pm 127.5$ c | $2650.5 \pm 202.5$ ab | $842.1 \pm 59.0$ a  | $1027.0 \pm 20.8$ a  |
|                                                              | RDE       | $2902.4 \pm 219.6$ b | $3218.4 \pm 161.6$ b  | $1150.0 \pm 83.7$ a | $1037.0 \pm 54.1$ a  |
|                                                              | Urea      | $3398.6 \pm 416.8$ c | $2977.5 \pm 168.1$ b  | $797.5 \pm 31.7$ a  | $1042.3 \pm 60.8$ a  |

n.d: not determined

**Table S4.** Pearson correlations among soil inorganic N ( $(\text{NH}_4^+ + \text{NO}_3^-)\text{-N}$ ), potential nitrification activity (PNA), potentially mineralizable N (PMN) and  $\text{N}_2\text{O}$  taken from the third and fourth dairy effluent applications.

|                      | PMN   | PNA   | $\text{NH}_4^+$ | $\text{NO}_3^-$ | $\text{N}_2\text{O}$ |
|----------------------|-------|-------|-----------------|-----------------|----------------------|
| PMN                  | 1     |       |                 |                 |                      |
| PNA                  | 0,45* | 1     |                 |                 |                      |
| $\text{NH}_4^+$      | -0,16 | -0,32 | 1               |                 |                      |
| $\text{NO}_3^-$      | -0,08 | -0,35 | 0,91**          | 1               |                      |
| $\text{N}_2\text{O}$ | 0,04  | -0,28 | 0,66**          | 0,76**          | 1                    |

\*Significant at  $p < 0.05$ ; \*\*significant at  $p < 0.0005$
